# Supplementary material for: Cellular Protein Phosphatase 2A Regulates Cell Survival Mechanisms in Influenza A Virus Infection
Source: MDPI journal article supplement (doi:10.3390/ijms222011164), 2021-10-16
Supplement: s1 [file s1]

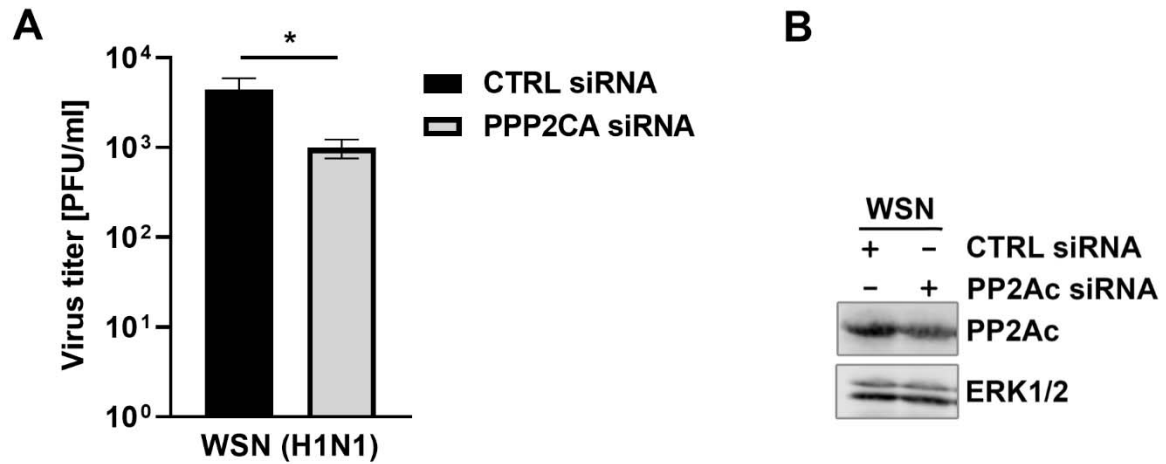

**Figure S1: Cellular PP2A is required for efficient IAV replication in Calu-3 cells.** A) Calu-3 cells were infected with IAV strain A/WSN/33 (H1N1, WSN) at a multiplicity of infection (MOI) of 0.01, 24 h after siRNA-mediated knockdown (KD) of PP2Ac. Amount of infectious particles was titrated with standard plaque assays. Data are depicted as means + standard deviation (SD) of one representative of two independent experiments. Statistical significance was analyzed by unpaired two-tailed t-test with \*  $p < 0.05$ . B) PP2Ac KD efficiency was visualized via western blotting.

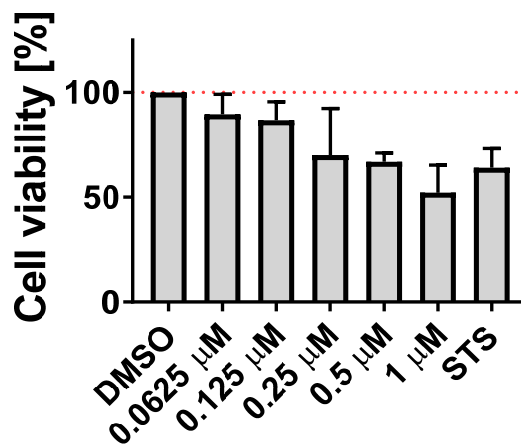

**Figure S2: Cytotoxic effects of varying concentrations of the inhibitor okadaic acid (OA).** A549 cells were treated with the indicated concentrations of OA. Cell viability was analyzed 6 h post stimulation via MTT-based cell viability assay. Treatment with 1  $\mu$ M staurosporin (STS) was used as positive control. Data are presented as means + SD of three independent experiments.

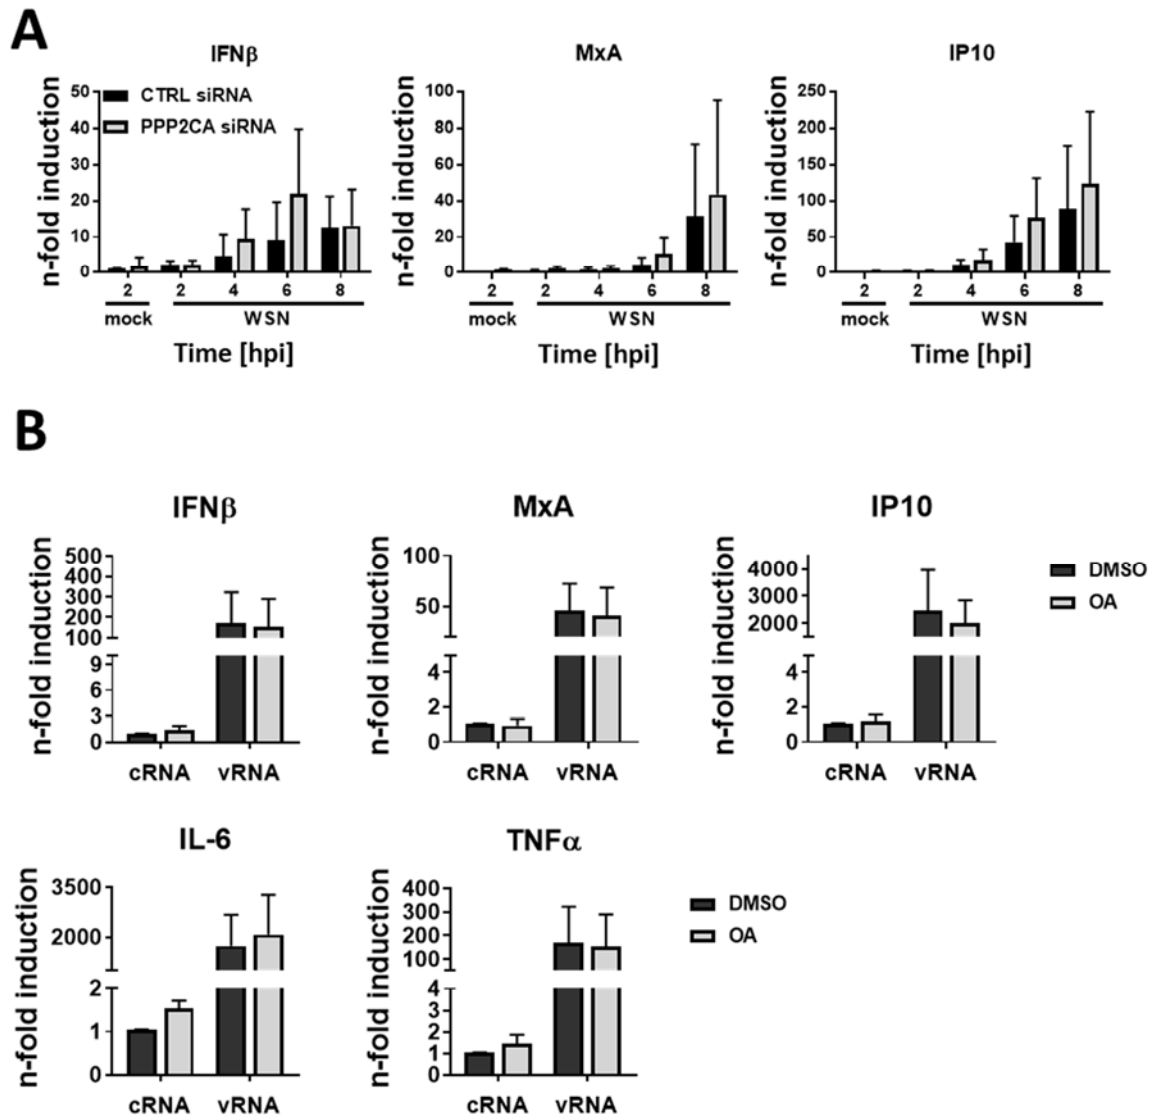

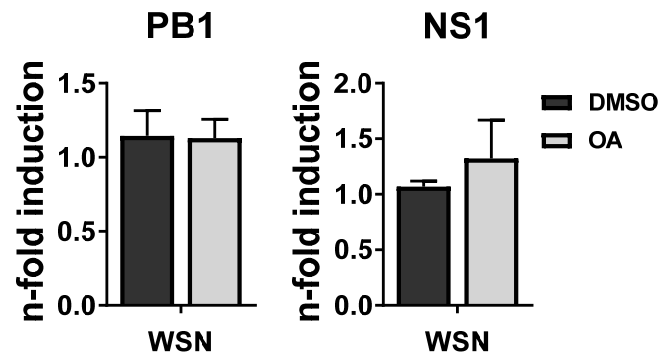

**Figure S4: Inhibition of PP2A activity does not alter the transcription of viral genes.** A549 cells were infected with A/WSN/33 (H1N1, MOI = 5) and treated with 100 nM OA or DMSO as solvent control starting 2 hpi. Transcription of exemplary viral genes was analyzed by quantitative real-time PCR 6 hpi. Data are presented as means + SD of three independent experiments with three biological replicates. Statistical significance was analysed by one-sample t-test.

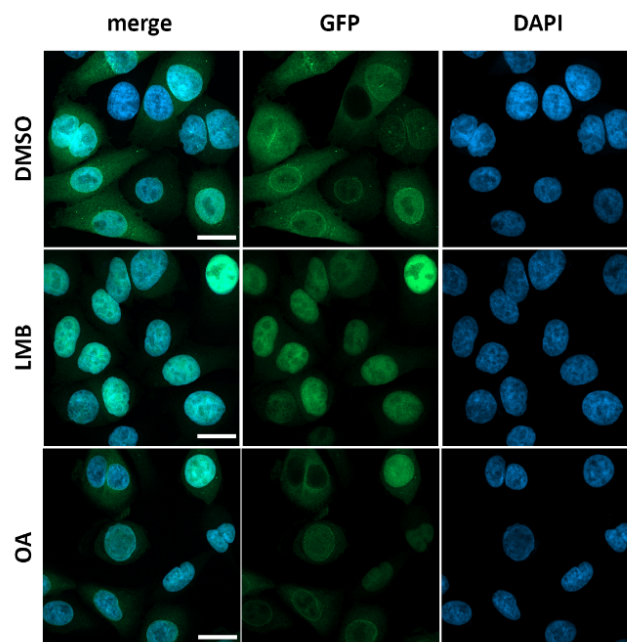

**Figure S5: PP2A does not affect the CRM-1-dependent nuclear export.** A549 cells stably expressing the GFP biosensor were treated with 5.55  $\mu$ g/ml leptomycin B (LMB), DMSO or 100 nM Okadaic acid (OA) for 3 h. Cells were fixed in 3.7% formaldehyde and nuclei were stained with DAPI. Scale bar corresponds to 20  $\mu$ m. Images are representatives of three independent experiments.

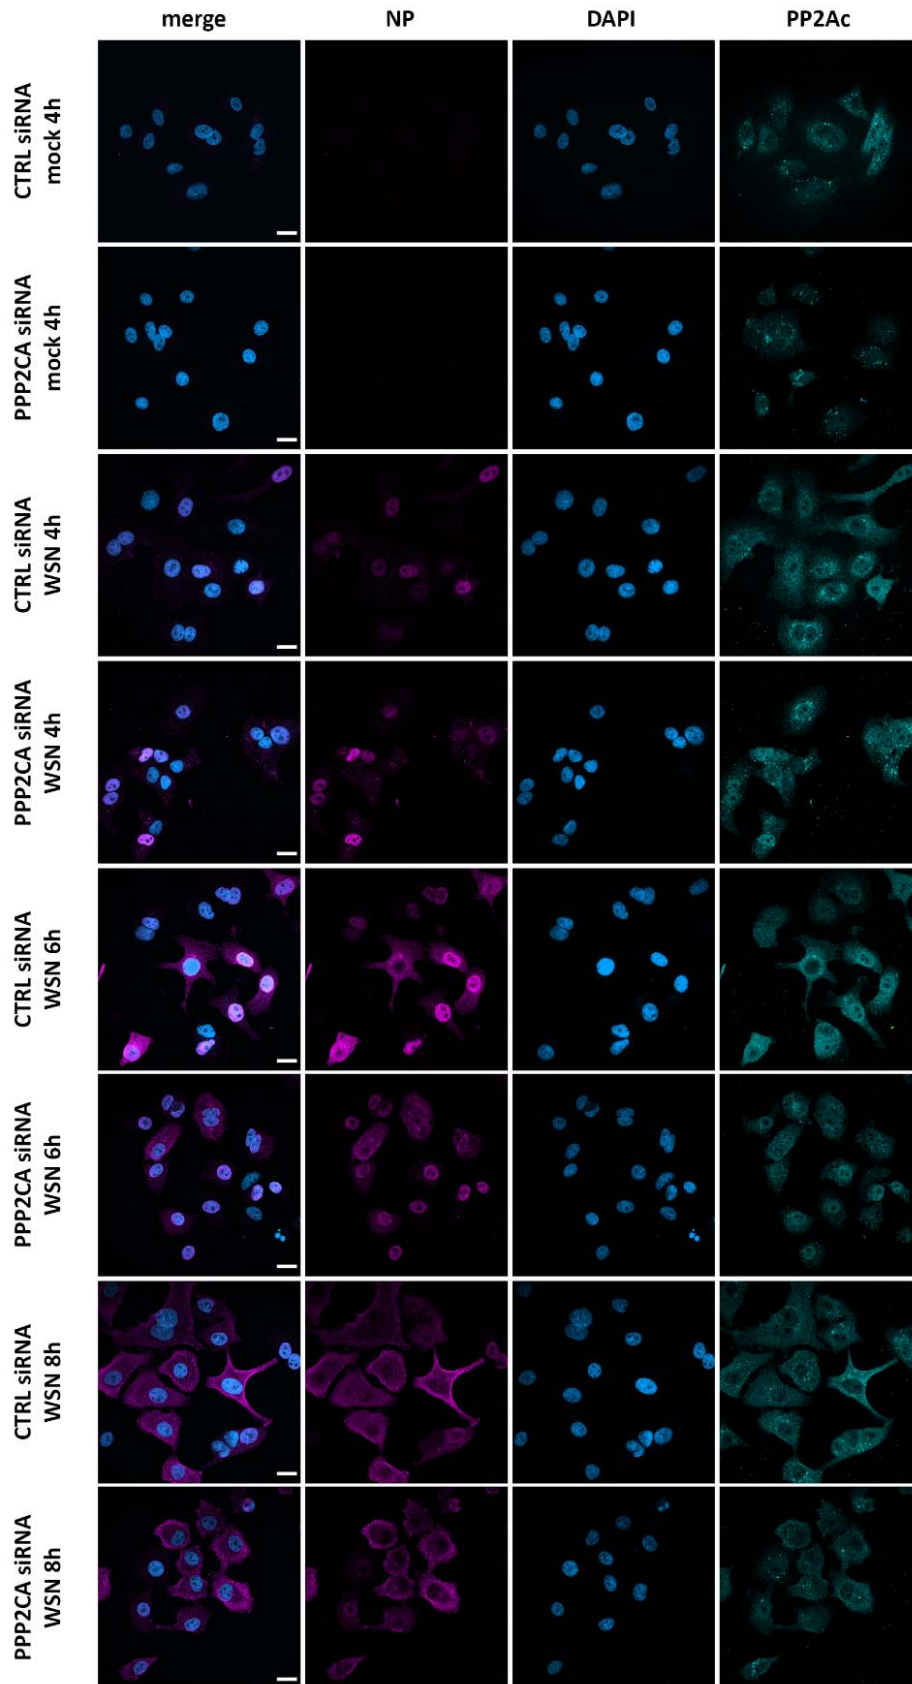

**Figure S6: PP2A does not affect trafficking of viral RNP complexes but induces an increased cell death phenotype in IAV-infected cells.** A549 cells were infected with influenza A/WSN/33 (WSN, MOI = 5) 48 h after siRNA-mediated KD of PP2Ac. Cells were fixed at the indicated time points in 3.7% formaldehyde and stained with specific antibodies against the IAV nucleoprotein (NP) and PP2Ac. Nuclei were stained with DAPI. Scale bar corresponds to 20  $\mu$ m. Images are representatives of three independent experiments.

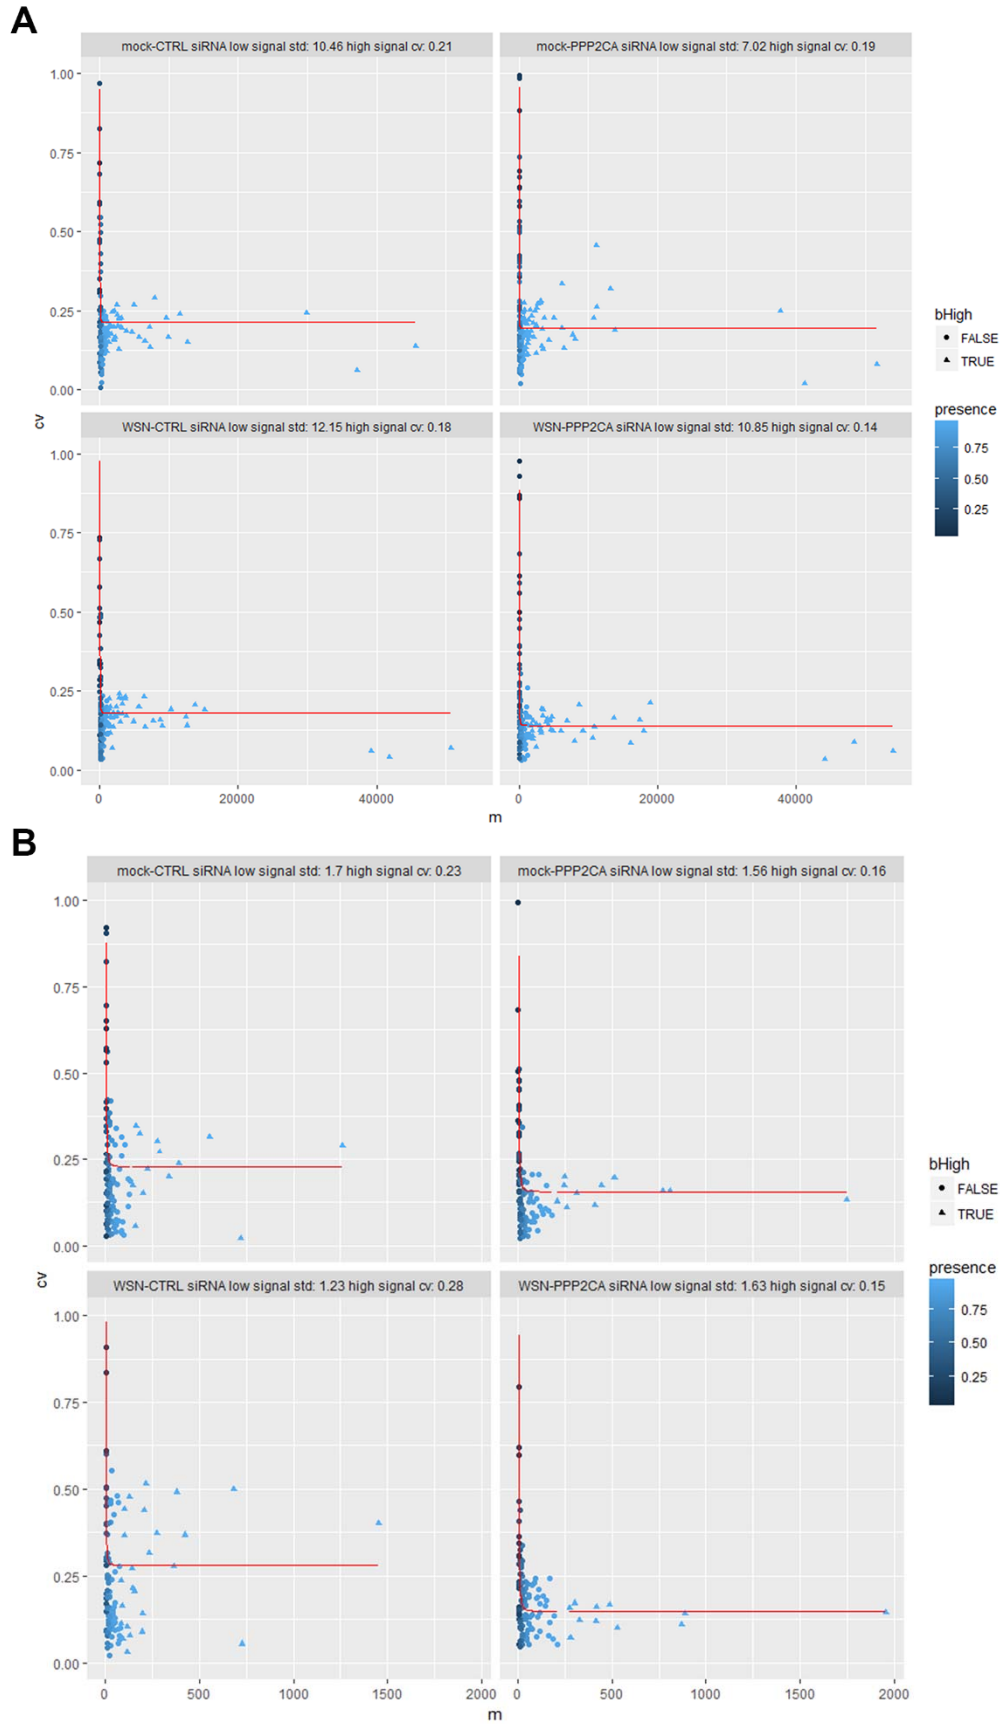

**Figure S7: Biological samples used for kinase activity profiling show low variance.** A, B) A549 cells were mock-infected or infected with WSN (MOI = 5) 48 h after PP2Ac KD, and the activity of tyrosine kinases (A) and serine/threonine kinases (B) was assessed 8 hpi by chip-based kinase activity profiling (PamGene technology). Depicted are coefficient of variance (CV) plots of three independent experiments.
